# Supplementary material for: Graphene growth via chemical vapour deposition on cross-rolled surface-textured nickel–copper foils
Source: Royal Society of Chemistry journal article supplement (doi:10.1039/d4ce00090k), 2024-01-01
Supplement: d4ce00090k1.pdf [file d4ce00090k1.pdf]

### Supplementary

## Graphene Growth by Chemical Vapour Deposition on Cross-Rolled Surface Textured Nickel-Copper Foils

Palash Chandra Maity<sup>a</sup>, Narasimha Vinod Pulagara<sup>a</sup>, Mamleshwar Kumar<sup>d</sup>, K N  
Chaithanya Kumar<sup>c</sup>, Taraknath Das<sup>d</sup>, K.S Suresh<sup>c\*</sup>, Indranil Lahiri<sup>a,b\*</sup>

<sup>a</sup> Nanomaterials and Applications Lab, Department of Metallurgical and Materials Engineering,  
Indian Institute of Technology Roorkee, India

<sup>b</sup> Centre for Nanotechnology, Indian Institute of Technology Roorkee, India

<sup>c</sup> Department of Metallurgical and Materials Engineering, Indian Institute of Technology  
Roorkee, India

<sup>d</sup> Department of Chemical Engineering Indian Institute of Technology Roorkee, India

\* Corresponding authors: K.S. Suresh, E mail- [ks.suresh@mt.iitr.ac.in](mailto:ks.suresh@mt.iitr.ac.in)

\* Corresponding authors: Indranil Lahiri, E mail- [indranil.lahiri@mt.iitr.ac.in](mailto:indranil.lahiri@mt.iitr.ac.in)

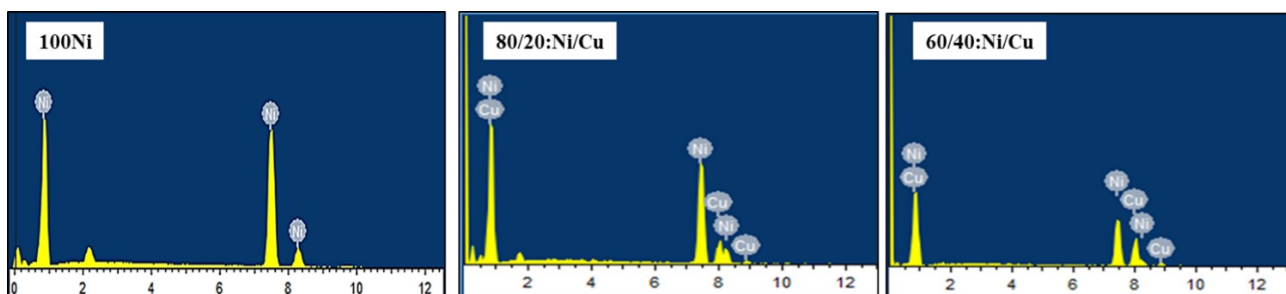

Figure S1: EDS spectra of the alloy samples

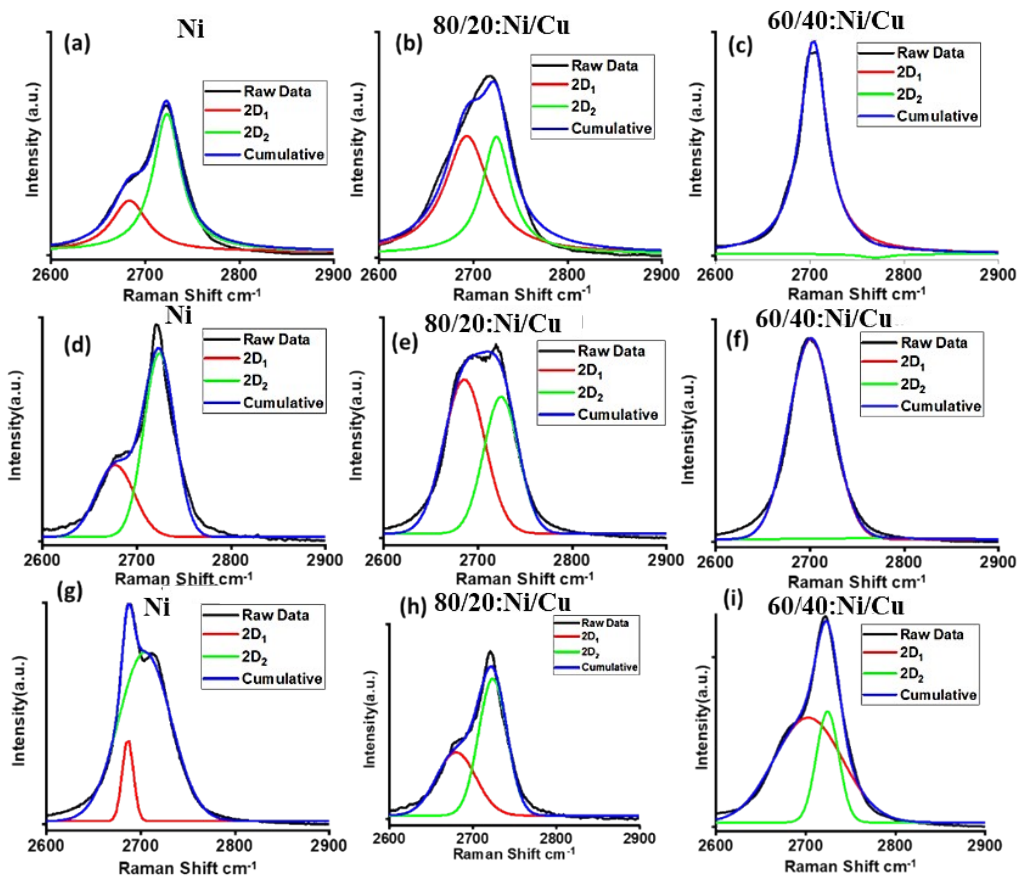

Figure S2: 2D splitting at the different positions of the samples

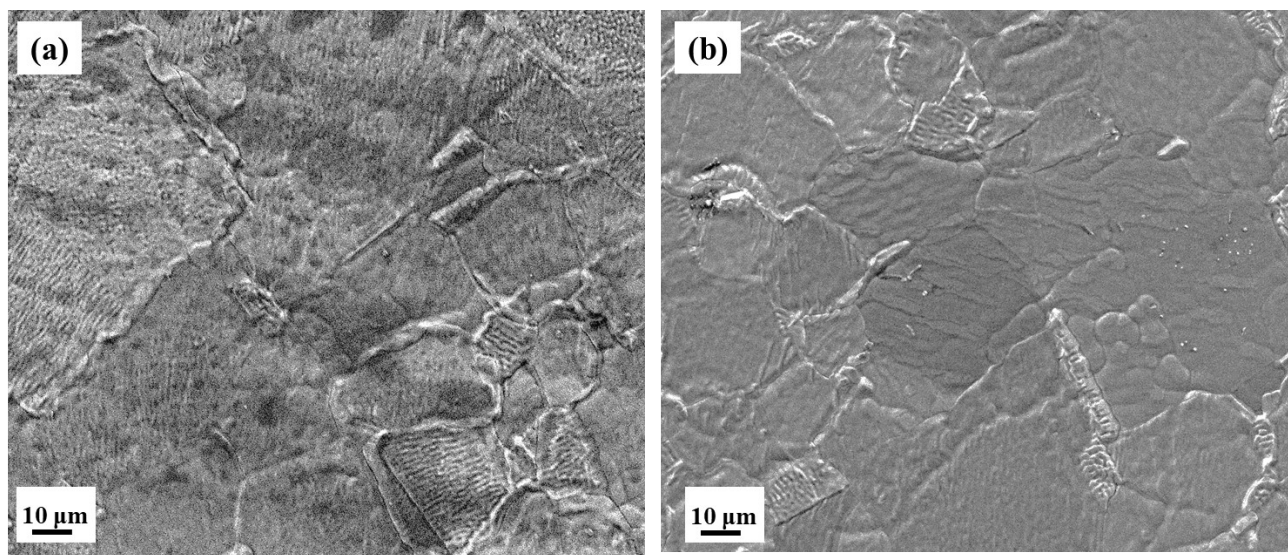

Figure S3: FESEM image of annealed sample (a) Ni and (b) 80/20: Ni/Cu

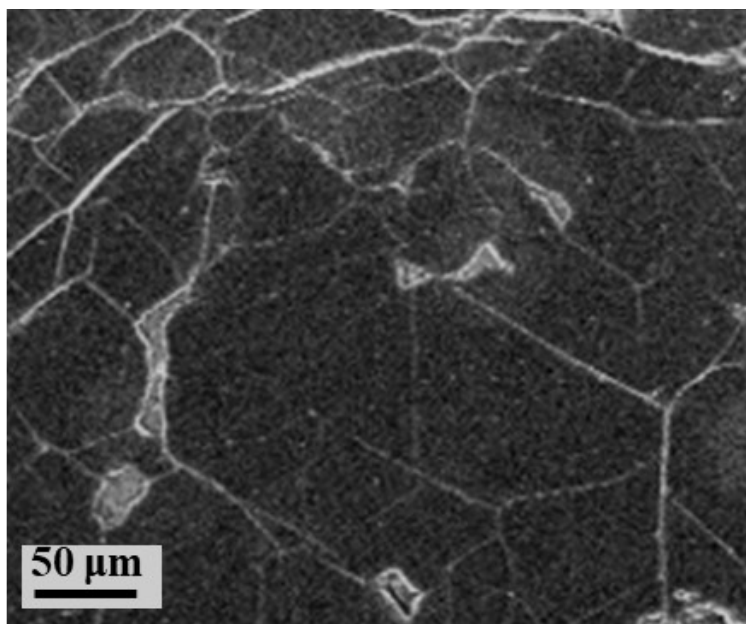

Figure S4: FESEM image after graphene synthesis on Ni sample

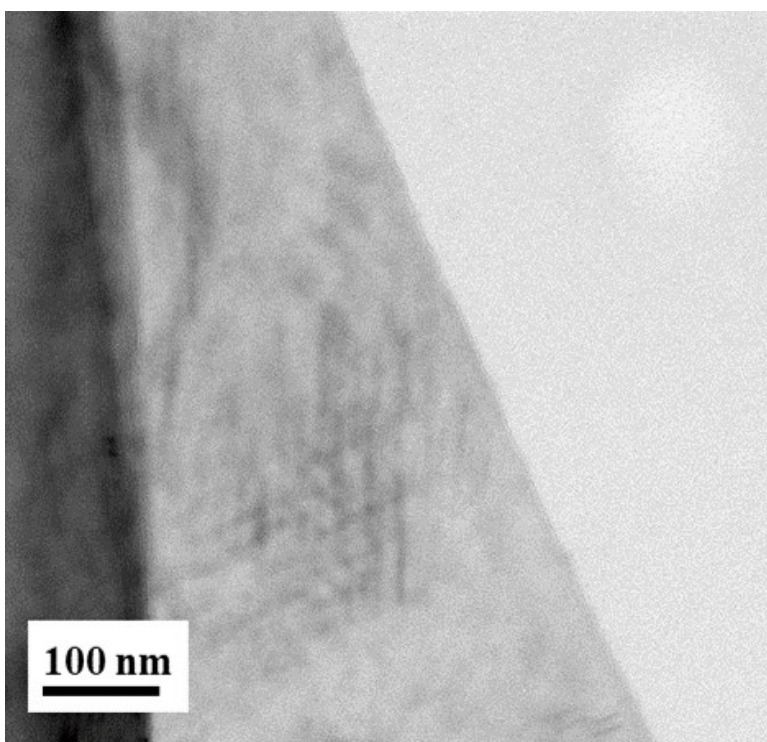

Figure S4: TEM image of graphene
